# Supplementary material for: Electrospun SiO2 nanofibers as a template to fabricate a robust and transparent superamphiphobic coating
Source: Royal Society of Chemistry journal article supplement (doi:10.1039/c3ra22968h), 2013-01-01
Supplement: c3ra22968h.pdf [file c3ra22968h.pdf]

## Electrospun SiO<sub>2</sub> nanofibers as a template to fabricate robust and transparent superamphiphobic coating

V. Anand Ganesh,<sup>a,b,d,e</sup> Saman Safari Dinachali,<sup>a,e</sup> Hemant Kumar Raut,<sup>a,b,d,e</sup> Timothy Michael Walsh,<sup>d</sup> A. Sreekumaran Nair,<sup>\*c</sup> and Seeram Ramakrishna<sup>a,b</sup>

<sup>a</sup> Department of Mechanical Engineering, National University of Singapore, Singapore 117574.

<sup>b</sup> Centre for Nanofibers & Nanotechnology, Nanoscience and Nanotechnology Initiative, National University of Singapore, Singapore.

<sup>c</sup> Amrita Centre for Nanosciences, Amrita Institute of Medical Sciences, Amrita Vishwa Vidyapeetham, AIMS Ponnekkara P.O., Kochi-682041, Kerala, India; E-mail: [sreekumarannair@aims.amrita.edu](mailto:sreekumarannair@aims.amrita.edu).

<sup>d</sup> Solar Energy Research Institute of Singapore, National University of Singapore, Singapore 117574.

<sup>e</sup> Institute of Materials Research and Engineering, Agency for Science, Technology and Research, 3 Research Link, Singapore 117602.

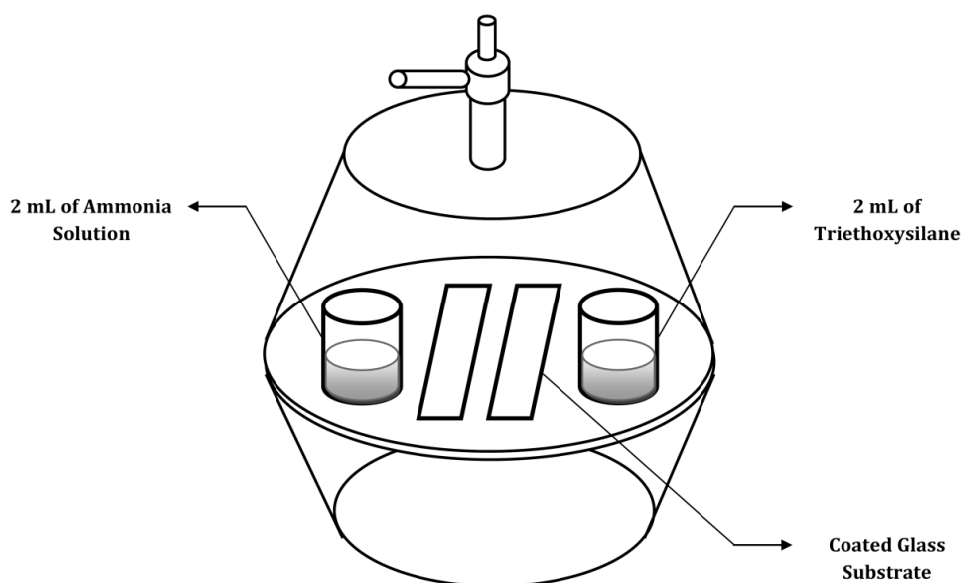

**Figure S1.** Schematic diagram showing the arrangement inside the desiccator.

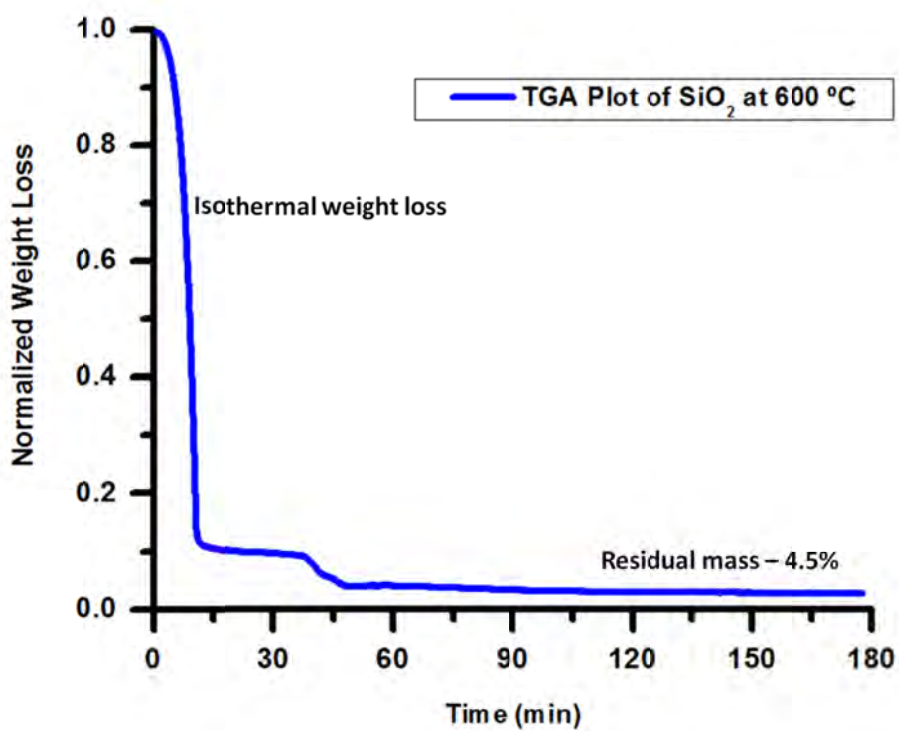

**Figure S2.** TGA analysis of SiO<sub>2</sub> sol-gel solution showing the mass losses during isothermal heating at 600 °C.

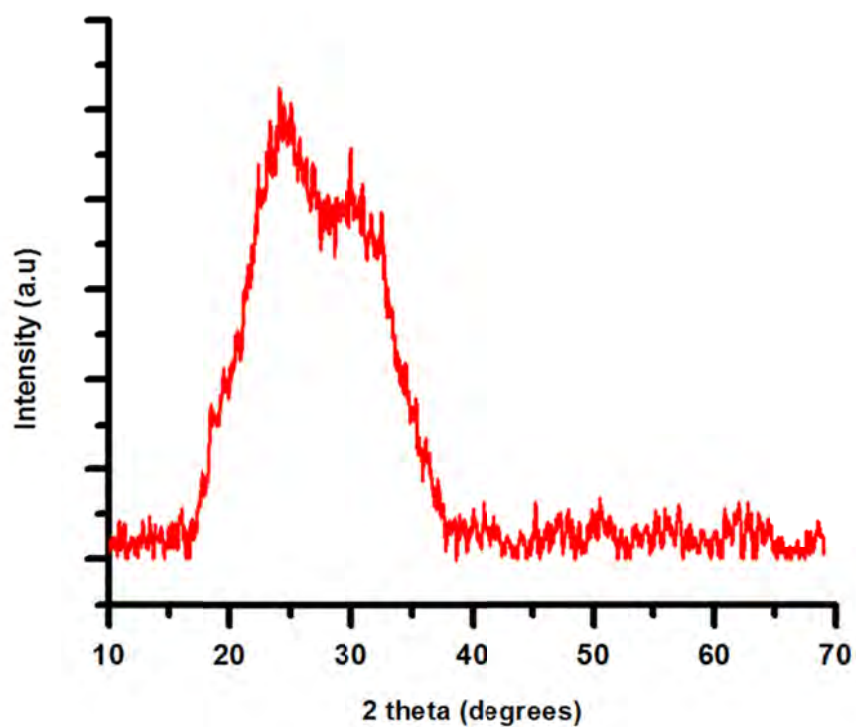

**Figure S3.** XRD pattern of the superamphiphobic coated sample.

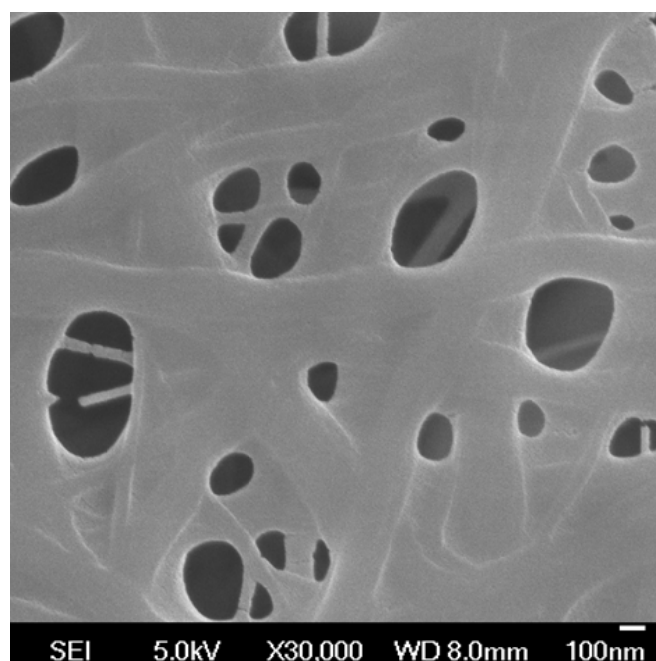

**Figure S4.** SEM image of the hybrid silica network after fluorinated silane treatment. (It is observed that the morphology of the hybrid silica network remains the same.)

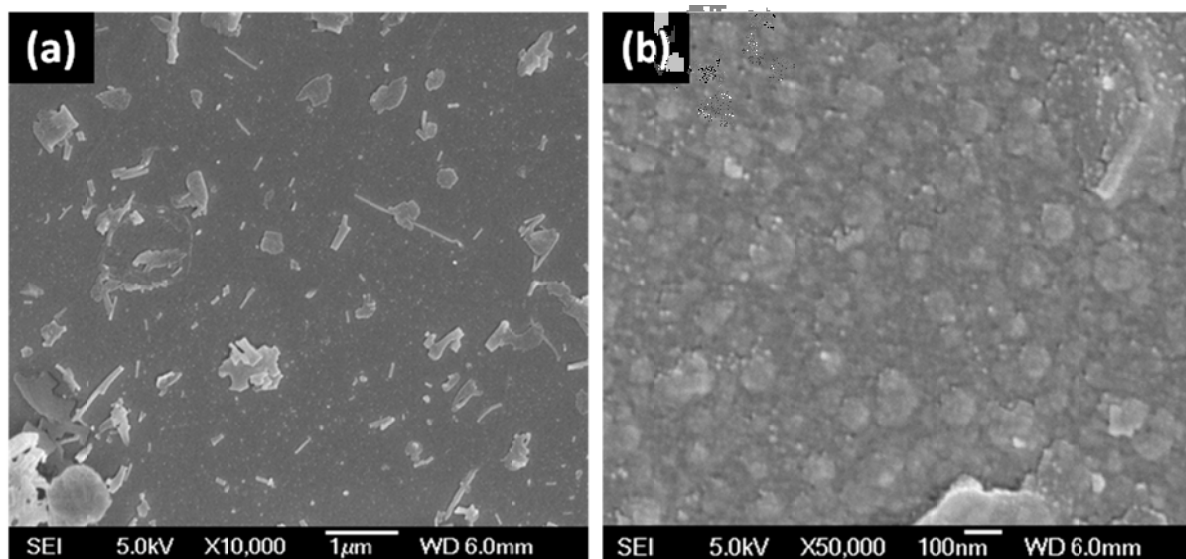

**Figure S5.** (a) and (b) SEM images (low and high magnification) of the SiO<sub>2</sub> coated sample without the silica membrane. SiO<sub>2</sub> nanofibers get disintegrated into nano particles after heat treatment (600 °C for 2 hr).

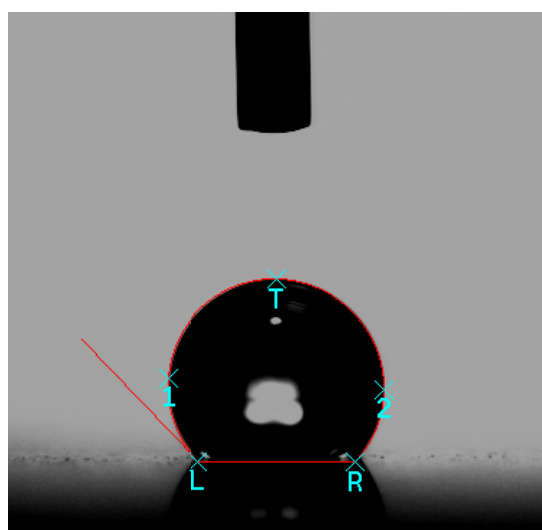

**Figure S6.** Water contact angle achieved on the SiO<sub>2</sub> coated sample without hybrid silica network (132.8°).

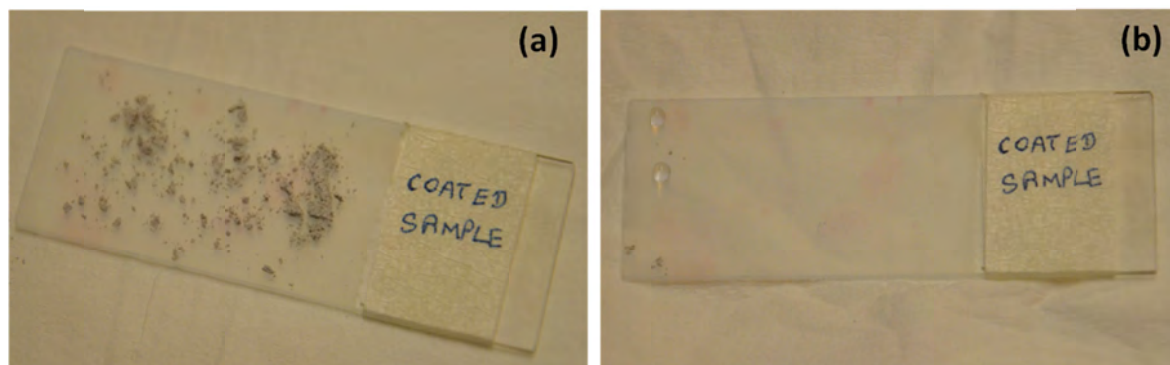

**Figure S7.** (a) Photograph of superamphiphobic coating polluted with surface contaminants (mixture of ashes and sand particles) and (b) Photograph showing the self-cleaning property of the superamphiphobic coating (water droplets rolls-off and cleans the surface).

**Video SV1.** Video clip showing the roll-off movement of water droplets ( $3 \mu\text{L}$ ) when deposited on the superamphiphobic coated surface.
